# Supplementary material
Source: PubMed Central journal article supplement (PMC5900345)
Supplement: ml7b00482_si_001.pdf [file ml7b00482_si_001.pdf]

## Supporting information

### Combined acylselenourea-diselenide structures: new potent and selective antitumoral agents as autophagy activators.

Pablo Garnica<sup>1,2</sup>, Ignacio Encío<sup>3</sup>, Daniel Plano<sup>1,2</sup>, Juan A. Palop<sup>1,2</sup>, Carmen Sanmartín<sup>1,2\*</sup>

<sup>1</sup> University of Navarra, Faculty of Pharmacy and Nutrition, Department of Organic and Pharmaceutical Chemistry, Irunlarrea 1, E-31008 Pamplona, Spain. <sup>2</sup> Instituto de Investigación Sanitaria de Navarra (IdiSNA), Irunlarrea 3, E-31008 Pamplona, Spain. <sup>3</sup> Department of Health Sciences, Public University of Navarra, Avda. Barañain s/n, E-31008 Pamplona, Spain

#### 1. Chemistry

##### 1.1. Material and methods

Proton (<sup>1</sup>H), carbon (<sup>13</sup>C) and selenium (<sup>77</sup>Se) NMR spectra were recorded on a Bruker 400 Ultrashield™ spectrometer (Rheinstetten, Germany) using DMSO-*d*<sub>6</sub> or CDCl<sub>3</sub> as solvent. IR spectra were recorded on a Thermo Nicolet FT-IR Nexus spectrophotometer using KBr pellets for solid samples. Elemental analysis was performed on a LECO CHN-900 Elemental Analyser. Purity of all final compounds was 95% or higher. Chemicals were purchased from E. Merck (Darmstadt, Germany), Panreac Química S.A. (Montcada i Reixac, Barcelona, Spain), Sigma-Aldrich Química, S.A. (Alcobendas, Madrid, Spain) and Acros Organics (Janssen Pharmaceuticaaan, Geel, Belgium).

##### 1.2. General procedure for the synthesis of compounds 1–16

Potassium selenocyanate (2.5 mmol) was solubilized in 30 mL of dry acetone under N<sub>2</sub> flux, and the corresponding acyl chloride (2.5 mmol) was added dropwise through the septum cover with a syringe. The mixture was stirred at room temperature for 1 h. Bis(4-aminophenyl)diselenide (1.25 mmol) is then added solubilized in 5 mL of dry acetone and stirred for a variable time of 1 h up to 12 h at room temperature. Then reaction was quenched with cold water, and stirred for 3 h. This resulted in the solubilisation of interfering KCl and the subsequent precipitation of a solid. This resulting powder was then filtered and purified by washing or extraction.

In order to assign the chemical shifts in NMR spectroscopy the following assignment has been done: central rings A and A', external rings B and B' (**Figure S1**).

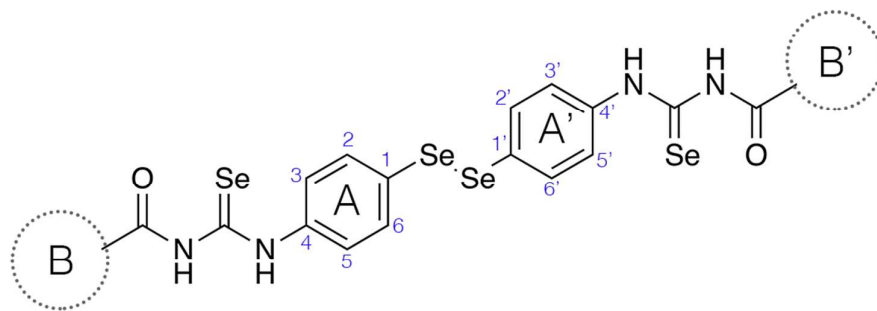

**Figure S1.** General structure and nomenclature used to locate the position of the substituted groups in the compounds presented herein.

1.3. *N,N'*-[(diselanediybis(benzene-4,1-diyl)selenecarbamoyl)] dibenzamide (**1**)

From benzoyl chloride. Conditions: 2 h at room temperature. The product was washed with ethyl ether twice ( $2 \times 25$  mL). A yellow powder was obtained. Yield: 70%. Mp: 134–135°C. IR (KBr)  $\text{cm}^{-1}$ : 1669 (C=O), 822 (Se-Se).  $^1\text{H}$  NMR (400 MHz,  $\text{DMSO-}d_6$ )  $\delta$ : 12.95 (bs, 2H, NH), 11.86 (bs, 2H, NH), 7.97 (d, 4H, B+B',  $J_{2,3}=J_{6,5}=7.9$  Hz,  $\text{H}_2+\text{H}_6$ ), 7.73–7.64 (m, 10H, B+B',  $\text{H}_4$ , A+A',  $\text{H}_2+\text{H}_3+\text{H}_5+\text{H}_6$ ), 7.55 (t, 4H, B + B',  $J_{3,2}=J_{3,4}=J_{5,6}=J_{5,4}=7.9$  Hz,  $\text{H}_3+\text{H}_5$ ).  $^{13}\text{C}$  NMR (100 MHz,  $\text{DMSO-}d_6$ )  $\delta$ : 180.95 (C=Se), 167.82 (C=O), 151.52 (B+B',  $\text{C}_4$ ), 138.88 (A+A',  $\text{C}_4$ ), 133.33 (A+A',  $\text{C}_2+\text{C}_6$ ), 131.18 (A+A',  $\text{C}_1$ ), 129.73 (B+B',  $\text{C}_1$ ), 129.27 (B+B',  $\text{C}_3+\text{C}_5$ ), 128.91 (B+B',  $\text{C}_2+\text{C}_6$ ), 127.91 (A+A',  $\text{C}_3+\text{C}_5$ ).  $^{77}\text{Se}$  NMR ( $\text{CDCl}_3$ , 76 MHz)  $\delta$ : 472.31 (C=Se), 421.01 (Se-Se). MS [ $m/z$  (% abundance)]: 77 (63), 105 (100), 121 (7). Elemental analysis calculated (%) for  $\text{C}_{28}\text{H}_{22}\text{N}_4\text{O}_2\text{Se}_4 \cdot \frac{1}{2}\text{H}_2\text{O}$ : C: 43.58, H: 3.01, N: 7.26; found: C: 43.43, H: 2.71, N: 6.97.

1.4. *N,N'*-[(diselanediybis(benzene-4,1-diyl)selenecarbamoyl)] di-4-methylbenzamide (**2**)

From 4-methylbenzoyl chloride. Conditions: 1 h at room temperature. The product was washed with ethyl ether twice ( $2 \times 25$  mL). A yellow powder was obtained. Yield: 93%. Mp: 155–156°C. IR (KBr)  $\text{cm}^{-1}$ : 3411 and 3375 (N-H), 2971 (C-H,  $\text{CH}_3$ ), 1665 (C=O), 821 (Se-Se).  $^1\text{H}$  NMR (400 MHz,  $\text{CDCl}_3$ )  $\delta$ : 13.14 (bs, 2H, NH), 9.40 (bs, 2H, NH), 7.81 (d, 4H, B+B',  $J_{2,3}=J_{6,5}=8.2$  Hz,  $\text{H}_2+\text{H}_6$ ), 7.74–7.66 (m, 8H, A+A',  $\text{H}_2+\text{H}_3+\text{H}_5+\text{H}_6$ ), 7.36 (d, 4H, B+B',  $J_{3,2}=J_{5,6}=8.2$  Hz,  $\text{H}_3+\text{H}_5$ ), 2.47 (s, 6H,  $\text{CH}_3$ ).  $^{13}\text{C}$  NMR (100 MHz,  $\text{DMSO-}d_6$ )  $\delta$ : 180.45 (C=Se), 167.81 (C=O), 143.77 (B+B',  $\text{C}_4$ ), 138.80 (A+A',  $\text{C}_4$ ), 132.92 (A+A',  $\text{C}_2+\text{C}_6$ ), 131.32 (A+A',  $\text{C}_1$ ), 128.99 (B+B',  $\text{C}_1$ ), 128.87 (B+B',  $\text{C}_3+\text{C}_5$ ), 128.00 (B+B',  $\text{C}_2+\text{C}_6$ ), 126.00 (A+A',  $\text{C}_3+\text{C}_5$ ), 21.16 ( $\text{CH}_3$ ).  $^{77}\text{Se}$  NMR ( $\text{CDCl}_3$ , 76 MHz)  $\delta$ : 472.30 (C=Se), 414.08 (Se-Se). MS [ $m/z$  (% abundance)]: 91 (55), 119 (100), 121 (7). Elemental analysis calculated (%) for  $\text{C}_{30}\text{H}_{26}\text{N}_4\text{O}_2\text{Se}_4 \cdot \text{HCl}$ : C: 43.58, H: 3.29, N: 6.78; found: C: 43.30, H: 3.21, N: 6.72.

1.5. *N,N'*-[(diselanediybis(benzene-4,1-diyl)selenecarbamoyl)] di-4-nitrobenzamide (**3**)

From 4-nitrobenzoyl chloride. Conditions: 2 h at room temperature. The product was washed with ethyl ether twice ( $2 \times 25$  mL). A yellow powder was obtained. Yield: 75%. Mp: 163–164°C. IR (KBr)  $\text{cm}^{-1}$ : 1657 (C=O), 1343 and 1259 ( $\text{NO}_2$  st), 819 (Se-Se).  $^1\text{H}$  NMR (400 MHz,  $\text{DMSO-}d_6$ )  $\delta$ : 12.49 (s, 1H, NH), 12.24 (s, 1H, NH), 11.38 (s, 1H, NH), 10.69 (s, 1H, 1H), 8.33 (d, 4H, B + B',  $J_{2,3}=J_{6,5}=8.8$  Hz,  $\text{H}_2+\text{H}_6$ ), 8.18 (d, 4H, B+B',  $J_{3,2}=J_{5,6}=8.8$  Hz,  $\text{H}_3+\text{H}_5$ ), 7.80–7.49 (m, 8H, A+A',  $\text{H}_2+\text{H}_3+\text{H}_5+\text{H}_6$ ).  $^{13}\text{C}$  NMR (100 MHz,  $\text{DMSO-}d_6$ )  $\delta$ : 180.71 (C=Se), 166.70 (C=O), 150.69 (B+B',  $\text{C}_4$ ), 137.21 (A+A',  $\text{C}_4$ ), 132.23 (A+A',  $\text{C}_2+\text{C}_6$ ), 131.58 (A+A',  $\text{C}_1$ ), 131.19 (B+B',  $\text{C}_1$ ), 130.71 (B+B',  $\text{C}_2+\text{C}_6$ ), 124.60 (A+A',  $\text{C}_3+\text{C}_5$ ), 124.21 (B+B',  $\text{C}_3+\text{C}_5$ ). MS [ $m/z$  (% abundance)]: 76 (33), 104 (37), 122 (7) 150 (100). Elemental analysis calculated (%) for  $\text{C}_{28}\text{H}_{20}\text{N}_6\text{O}_6\text{Se}_4 \cdot \frac{1}{2}\text{HCl}$ : C: 38.60, H: 2.37, N: 9.65; found: C: 38.45, H: 2.17, N: 9.95.

1.6. *N,N'*-[(diselanediybis(benzene-4,1-diyl)selenecarbamoyl)] di-4-methylthiobenzamide (**4**)

From 4-methylthiobenzoyl chloride. Conditions: 3 h at room temperature. The product was washed with ethyl ether twice ( $2 \times 25$  mL). A yellow powder was obtained. Yield: 76%. Mp: 140–141°C. IR (KBr)  $\text{cm}^{-1}$ : 1664 (C=O), 817 (Se-Se).  $^1\text{H}$  NMR (400 MHz, DMSO- $d_6$ )  $\delta$ : 12.99 (bs, 2H, NH), 11.79 (bs, 2H, NH), 7.93 (d, 4H, B+B',  $J_{2,3} = J_{4,5} = 8.2$  Hz,  $\text{H}_2 + \text{H}_6$ ), 7.76–7.59 (m, 8H, A+A',  $\text{H}_2 + \text{H}_3 + \text{H}_5 + \text{H}_6$ ), 7.38 (d, 4H,  $J_{3,2} = J_{5,6} = 8.2$  Hz,  $\text{H}_3 + \text{H}_5$ ), 2.55 (s, 6H,  $\text{CH}_3$ ).  $^{13}\text{C}$  NMR (100 MHz, DMSO- $d_6$ )  $\delta$ : 180.48 (C=Se), 167.43 (C=O), 145.85 (B+B',  $\text{C}_4$ ), 138.85 (A+A',  $\text{C}_4$ ), 133.02 (A+A',  $\text{C}_2 + \text{C}_6$ ), 131.36 (A+A',  $\text{C}_1$ ), 129.33 (B+B',  $\text{C}_1$ ), 126.08 (A+A',  $\text{C}_3 + \text{C}_5$ ), 124.87 (B+B',  $\text{C}_3 + \text{C}_5$ ), 124.61 (B+B',  $\text{C}_2 + \text{C}_6$ ), 13.95 ( $\text{SCH}_3$ ).  $^{77}\text{Se}$  NMR ( $\text{CDCl}_3$ , 76 MHz)  $\delta$ : 472.23 (C=Se), 415.24 (Se-Se). MS [ $m/z$  (% abundance)]: 123 (11), 151 (100). Elemental analysis calculated (%) for  $\text{C}_{30}\text{H}_{26}\text{N}_4\text{O}_2\text{S}_2\text{Se}_4 \cdot \text{H}_2\text{O} \cdot \text{HCl}$ : C: 39.64, H: 3.22, N: 6.16; found: C: 39.35, H: 3.01, N: 6.09.

#### 1.7. *N,N'*-[(diselanediylbis(benzene-4,1-diyl)selenecarbamoyl)] di-4-chlorobenzamide (5)

From 4-chlorobenzoyl chloride. Conditions: 2 h at room temperature. The product was kept under stirring for 24 h with 100 mL of ethyl ether then filtered to obtain final product. A yellow powder was obtained. Yield: 69%. Mp: 157°C. IR (KBr)  $\text{cm}^{-1}$ : 1651 (C=O), 1090 (C-Cl), 815 (Se-Se).  $^1\text{H}$  NMR (400 MHz, DMSO- $d_6$ )  $\delta$ : 12.85 (bs, 2H, NH), 11.97 (bs, 2H, NH), 7.98 (d, 4H, B+B',  $J_{2,3} = J_{5,6} = 8.6$  Hz,  $\text{H}_2 + \text{H}_6$ ), 7.74–7.54 (m, 12H, A+A',  $\text{H}_2 + \text{H}_3 + \text{H}_5 + \text{H}_6$ , B+B',  $\text{H}_3 + \text{H}_5$ ).  $^{13}\text{C}$  NMR (100 MHz, DMSO- $d_6$ )  $\delta$ : 182.80 (C=Se), 167.31 (C=O), 141.37 (B+B',  $\text{C}_4$ ), 138.65 (A+A',  $\text{C}_4$ ), 132.00 (A+A',  $\text{C}_2 + \text{C}_6$ ), 131.66 (A+A',  $\text{C}_1$ ), 130.25 (B+B',  $\text{C}_1$ ), 129.60 (B+B',  $\text{C}_2 + \text{C}_6$ ), 129.15 (B+B',  $\text{C}_3 + \text{C}_5$ ), 126.98 (A+A',  $\text{C}_3 + \text{C}_5$ ). MS [ $m/z$  (% abundance)]: 111 (44), 139 (100). Elemental analysis calculated (%) for  $\text{C}_{28}\text{H}_{20}\text{Cl}_2\text{N}_4\text{O}_2\text{Se}_4 \cdot \text{HCl}$ : C: 38.63, H: 2.41, N: 6.43; found: C: 38.35, H: 2.06, N: 6.15.

#### 1.8. *N,N'*-[(diselanediylbis(benzene-4,1-diyl)selenecarbamoyl)] di-4-methoxybenzamide (6)

From 4-methoxybenzoyl chloride. Conditions: 12 h at room temperature. The product was kept under stirring for 24 h with 100 mL of ethyl ether then filtered to obtain final product. A yellow powder was obtained. Yield: 46%. Mp: 134–135°C. IR (KBr)  $\text{cm}^{-1}$ : 1655 (C=O), 1254 (C-O), 819 (Se-Se).  $^1\text{H}$  NMR (400 MHz, DMSO- $d_6$ )  $\delta$ : 12.89 (bs, 2H, NH), 11.63 (bs, 2H, NH), 7.96 (d, 4H, B+B',  $J_{2,3} = J_{4,5} = 8.5$  Hz,  $\text{H}_2 + \text{H}_6$ ), 7.80–7.54 (m, 8H, A+A',  $\text{H}_2 + \text{H}_3 + \text{H}_5 + \text{H}_6$ ), 7.07 (d, 4H,  $J_{3,2} = J_{5,6} = 8.5$  Hz,  $\text{H}_3 + \text{H}_5$ ), 3.84 (s, 6H,  $\text{CH}_3$ ).  $^{13}\text{C}$  NMR (100 MHz, DMSO- $d_6$ )  $\delta$ : 180.73 (C=Se), 165.44 (C=O), 162.47 (B+B',  $\text{C}_4$ ), 140.16 (A+A',  $\text{C}_4$ ), 133.40 (A+A',  $\text{C}_2 + \text{C}_6$ ), 131.80 (A+A',  $\text{C}_1$ ), 130.12 (B+B',  $\text{C}_1$ ), 124.35 (A+A',  $\text{C}_3 + \text{C}_5$ ), 121.47 (B+B',  $\text{C}_3 + \text{C}_5$ ), 114.09 (B+B',  $\text{C}_2 + \text{C}_6$ ), 55.91 ( $\text{OCH}_3$ ). MS [ $m/z$  (% abundance)]: 107 (64), 135 (100). Elemental analysis calculated (%) for  $\text{C}_{30}\text{H}_{26}\text{N}_4\text{O}_4\text{Se}_4 \cdot \text{HCl}$ : C: 41.95, H: 3.17, N: 6.52; found: C: 42.23, H: 3.22, N: 6.15.

#### 1.9. *N,N'*-[(diselanediylbis(benzene-4,1-diyl)selenecarbamoyl)] di-3,5-dimethoxybenzamide (7)

From 3,5-dimethoxybenzoyl chloride. Conditions: 3 h at room temperature. The product was kept under stirring for 24 h with 100 mL of ethyl ether then filtered to obtain final product. A yellow powder was obtained. Yield: 65%. Mp: 150–151°C. IR (KBr)  $\text{cm}^{-1}$ : 1670 (C=O), 1244 (C-O), 830 (Se-Se).  $^1\text{H}$  NMR (400 MHz, DMSO- $d_6$ )  $\delta$ : 12.94 (bs, 2H, NH), 11.84 (bs, 2H, NH), 7.60–7.74 (m, 8H, A+A',  $\text{H}_2 + \text{H}_3 + \text{H}_5 + \text{H}_6$ ), 7.14 (s, 4H, B+B',  $\text{H}_2 + \text{H}_6$ ), 6.77 (s, 2H, B+B',  $\text{H}_4$ ), 3.84 (s, 12H,  $\text{OCH}_3$ ).  $^{13}\text{C}$  NMR (100 MHz, DMSO- $d_6$ )  $\delta$ : 180.35 (C=Se), 167.32 (C=O), 160.90 (B+B',  $\text{C}_3 + \text{C}_5$ ), 138.70 (A+A',  $\text{C}_4$ ), 136.23 (B+B',  $\text{C}_1$ ), 133.60 (A+A',  $\text{C}_2 + \text{C}_6$ ), 131.22 (A+A',  $\text{C}_1$ ), 125.94 (A+A',  $\text{C}_3 + \text{C}_5$ ), 106.30 (B+B',  $\text{C}_2 + \text{C}_6$ ), 105.37 (B+B',  $\text{C}_4$ ), 55.49 ( $\text{OCH}_3$ ).  $^{77}\text{Se}$  NMR (DMSO- $d_6$ , 76 MHz)  $\delta$ : 456.75 (C=Se), 429.05 (Se-Se). MS [ $m/z$  (% abundance)]: 137 (34), 165 (100). Elemental analysis calculated (%) for  $\text{C}_{32}\text{H}_{30}\text{N}_4\text{O}_6\text{Se}_4$ : C: 43.55, H: 3.43, N: 6.35; found: C: 43.18, H: 3.52, N: 5.97.

#### 1.10. *N,N'*-[(diselanediylbis(benzene-4,1-diyl)selenecarbamoyl)] di-3,4,5-trimethoxybenzamide (8)

From 3,4,5-trimethoxybenzoyl chloride. Conditions: 2 h at room temperature. The product was washed with ethyl ether twice ( $2 \times 25$  mL). A yellow powder was obtained. Yield: 25%. Mp: 105–106°C. IR (KBr)  $\text{cm}^{-1}$ : 1664 (C=O), 827 (Se-Se).  $^1\text{H}$  NMR (400 MHz, DMSO- $d_6$ )  $\delta$ : 13.06 (bs, 2H, NH), 11.84 (bs, 2H, NH), 7.68 (bs, 8H, A+A',  $\text{H}_2 + \text{H}_3 + \text{H}_5 + \text{H}_6$ ), 7.38 (s, 4H, B+B',  $\text{H}_2 + \text{H}_6$ ), 3.90–3.65 (m, 18H,  $\text{OCH}_3$ ).  $^{13}\text{C}$  NMR (100 MHz, DMSO- $d_6$ )  $\delta$ : 181.23 (C=Se), 167.88 (C=O), 153.00 (B+B',  $\text{C}_3 + \text{C}_5$ ), 148.59 (B+B',  $\text{C}_4$ ), 139.30 (A+A',  $\text{C}_4$ ), 133.63 (A+A',  $\text{C}_2 + \text{C}_6$ ), 131.88 (A+A',  $\text{C}_1$ ),

126.53 (A+A', C<sub>3</sub>+C<sub>5</sub>), 121.96 (B+B', C<sub>1</sub>), 106.95 (B+B', C<sub>2</sub>+C<sub>6</sub>), 60.63 (OCH<sub>3</sub>) 56.50 (OCH<sub>3</sub>). MS [*m/z* (% abundance)]: 195 (100). Elemental analysis calculated (%) for C<sub>34</sub>H<sub>34</sub>N<sub>4</sub>O<sub>8</sub>Se<sub>4</sub> · HCl: C: 41.71, H: 3.60, N: 5.72; found: C: 42.05, H: 3.91, N: 5.77.

1.11. *N,N'*-[(diselanediylbis(benzene-4,1-diyl)selenecarbamoyl)] di-2-furanamide (**9**)

From 2-furoyl chloride. Conditions: 12 h at room temperature. The product was kept under stirring with alkaline water (pH= 8–9) for 24 h, then filtered and washed with ethyl ether (2 × 25 mL). A yellow powder was obtained. Yield: 46%. Mp: 120–121°C. IR (KBr) cm<sup>-1</sup>: 3387 (N-H), 1674 (C=O), 823 (Se-Se). <sup>1</sup>H NMR (400 MHz, DMSO-*d*<sub>6</sub>) δ: 12.72 (bs, 2H, NH), 11.54 (bs, 2H, NH), 8.09 (bs, 2H, B+B', H<sub>3</sub>), 7.87 (d, 2H, B+B', *J*<sub>5,4</sub>= 1.7 Hz, H<sub>5</sub>), 7.68 (d, 4H, A+A', *J*<sub>2,3</sub>= *J*<sub>6,5</sub>= 7.5 Hz, H<sub>2</sub>+H<sub>6</sub>), 7.63 (d, 4H, A+A', *J*<sub>3,2</sub>= *J*<sub>5,6</sub>= 7.5 Hz, H<sub>3</sub>+H<sub>5</sub>), 6.76 (t, 2H, B+B', *J*<sub>4,5</sub>= 1.7 Hz, H<sub>4</sub>). <sup>13</sup>C NMR (100 MHz, DMSO-*d*<sub>6</sub>) δ: 179.95 (C=Se), 157.16 (C=O), 148.64 (B+B', C<sub>1</sub>), 144.44 (B+B', C<sub>4</sub>), 138.82 (A+A', C<sub>4</sub>), 132.96 (A+A', C<sub>2</sub>+C<sub>6</sub>), 131.36 (A+A', C<sub>1</sub>), 126.10 (A+A', C<sub>3</sub>+C<sub>5</sub>), 119.12 (B+B', C<sub>2</sub>), 112.80 (B+B', C<sub>3</sub>). MS [*m/z* (% abundance)]: 43 (100), 95 (84), 111 (22). Elemental analysis calculated (%) for C<sub>24</sub>H<sub>18</sub>N<sub>4</sub>O<sub>4</sub>Se<sub>4</sub> · HCl: C: 37.02, H: 2.46, N: 7.19; found: C: 36.84, H: 2.73, N: 7.36.

1.12. *N,N'*-[(diselanediylbis(benzene-4,1-diyl)selenecarbamoyl)] diisoxazole-5-amide (**10**)

From isoxazole-5-carbonyl chloride. Conditions: 12 h at room temperature. Product was extracted with dichloromethane and solvent was removed under vacuum by rotatory evaporation. In the next step the product is washed with ethyl ether (2 × 25 mL). A yellow powder was obtained. Yield: 16.5%. Mp: 138–139°C. IR (KBr) cm<sup>-1</sup>: 3163 (N-H st), 1685 (C=O), 819 (Se-Se). <sup>1</sup>H NMR (400 MHz, DMSO-*d*<sub>6</sub>) δ: 12.45 (bs, 1H, NH), 12.12 (bs, 1H, NH), 11.40 (s, 0.5H, NH), 10.86 (s, 0.5H, NH), 10.32 (s, 0.5H), 8.87 (s, 2H, B+B', H<sub>4</sub>+H<sub>5</sub>), 7.77–7.53 (m, 10H, A+A', H<sub>2</sub>+H<sub>3</sub>+H<sub>5</sub>+H<sub>6</sub>, B+B', H<sub>5</sub>). <sup>13</sup>C NMR (100 MHz, DMSO-*d*<sub>6</sub>) δ: 180.14 (C=Se), 168.29 (C=O), 156.90 (B+B', C<sub>1</sub>), 152.38 (B+B', C<sub>4</sub>), 138.28 (A+A', C<sub>4</sub>), 133.35 (A+A', C<sub>2</sub>+C<sub>6</sub>), 131.07 (A+A', C<sub>1</sub>), 126.81 (A+A', C<sub>3</sub>+C<sub>5</sub>), 108.96 (B+B', C<sub>5</sub>). MS [*m/z* (% abundance)]: 43 (97). Elemental analysis calculated (%) for C<sub>22</sub>H<sub>16</sub>N<sub>6</sub>O<sub>4</sub>Se<sub>4</sub>: C: 35.50, H: 2.17, N: 11.29; found: C: 35.60, H: 2.55, N: 10.92.

1.13. *N,N'*-[(diselanediylbis(benzene-4,1-diyl)selenecarbamoyl)] di-2-thiophenamide (**11**)

From 2-thiophencarbonyl chloride. Conditions: 2 h at room temperature. The product was washed with ethyl ether twice (2 × 25 mL). An orange powder was obtained. Yield: 100%. Mp: 100–101°C. IR (KBr) cm<sup>-1</sup>: 1653 (C=O), 827 (Se-Se). <sup>1</sup>H NMR (400 MHz, DMSO-*d*<sub>6</sub>) δ: 12.81 (bs, 2H, NH), 11.88 (bs, 2H, NH), 8.42 (d, 2H, B+B', *J*<sub>5,4</sub>= 3.5, H<sub>5</sub>), 8.08 (d, 2H, B+B', *J*<sub>3,4</sub>= 4.7, H<sub>3</sub>), 7.77–7.61 (m, 8H, A+A', H<sub>2</sub>+H<sub>3</sub>+H<sub>5</sub>+H<sub>6</sub>), 7.27 (t, 2H, B+B', *J*<sub>4,3</sub>= 4.7, *J*<sub>4,5</sub>= 3.5 Hz, H<sub>4</sub>). <sup>13</sup>C NMR (100 MHz, DMSO-*d*<sub>6</sub>) δ: 180.37 (C=Se), 163.38 (C=O), 140.79 (A+A', C<sub>4</sub>), 135.10 (B+B', C<sub>1</sub>), 133.67 (A+A', C<sub>2</sub>+C<sub>6</sub>), 131.42 (A+A', C<sub>1</sub>), 129.11 (B+B', C<sub>3</sub>), 128.69 (B+B', C<sub>5</sub>), 128.34 (B+B', C<sub>4</sub>), 126.57 (A+A', C<sub>3</sub>+C<sub>5</sub>). MS [*m/z* (% abundance)]: 43 (100), 111 (85), 83 (34). Elemental analysis calculated (%) for C<sub>24</sub>H<sub>18</sub>N<sub>4</sub>O<sub>2</sub>S<sub>2</sub>Se<sub>4</sub> · HCl: C: 35.55, H: 2.36, N: 6.91; found: C: 35.38, H: 2.60, N: 6.60.

1.14. *N,N'*-[(diselanediylbis(benzene-4,1-diyl)selenecarbamoyl)] di-3-chlorothiophen-2-amide (**12**)

Chlorination of 3-chlorothiophene-2-carboxylic acid with thionyl chloride was needed to obtain the corresponding acyl chloride. Conditions: 12 h at room temperature. The product was washed with ethyl ether twice (2 × 25 mL). An orange powder was obtained. Yield: 83%. Mp: 133–134°C. IR (KBr) cm<sup>-1</sup>: 1643 (C=O), 1017 (C-Cl), 824 (Se-Se). <sup>1</sup>H NMR (400 MHz, DMSO-*d*<sub>6</sub>) δ: 12.80 (bs, 2H, NH), 11.87 (bs, 2H, NH), 8.48–7.46 (m, 10H, A+A', H<sub>2</sub>+H<sub>3</sub>+H<sub>5</sub>+H<sub>6</sub>, B+B', H<sub>3</sub>), 7.47–7.11 (m, 2H, B+B', H<sub>4</sub>). <sup>13</sup>C NMR (100 MHz, DMSO-*d*<sub>6</sub>) δ: 180.67 (C=Se), 163.33 (C=O), 140.79 (A+A', C<sub>4</sub>), 133.73 (A+A', C<sub>2</sub>+C<sub>6</sub>), 135.11 (B+B', C<sub>1</sub>), 131.42 (A+A', C<sub>1</sub>), 129.11 (B+B', C<sub>3</sub>), 128.69 (B+B', C<sub>5</sub>), 128.34 (B+B', C<sub>4</sub>), 121.15 (A+A', C<sub>3</sub>+C<sub>5</sub>). MS [*m/z* (% abundance)]: 111 (100). Elemental analysis calculated (%) for C<sub>24</sub>H<sub>16</sub>Cl<sub>2</sub>N<sub>4</sub>O<sub>2</sub>S<sub>2</sub>Se<sub>4</sub> · H<sub>2</sub>O: C: 33.47, H: 2.11, N: 6.51; found: C: 33.56, H: 2.34, N: 6.49.

1.15. *N,N'*-[(diselanediylbis(benzene-4,1-diyl)selenecarbamoyl)] di-benzo[b]thiophene-2-amide (13)

Chlorination of 1-benzothiophene-2-carboxylic acid with thionyl chloride was needed to obtain the corresponding acyl chloride. Conditions: 12 h at room temperature. The product was washed with ethyl ether twice (2 × 25 mL). A yellow powder was obtained. Yield: 95%. Mp: 150–152°C. IR (KBr)  $\text{cm}^{-1}$ : 1654 (C=O), 824 (Se-Se).  $^1\text{H}$  NMR (400 MHz, DMSO- $d_6$ )  $\delta$ : 12.73 (bs, 2H, NH), 12.13 (bs, 2H, NH), 8.80 (s, 2H, H<sub>9</sub>), 8.10 (d, 2H, B+B',  $J_{4,5}$  = 8.2 Hz, H<sub>4</sub>), 8.04 (d, 2H, B+B',  $J_{7,6}$  = 7.81, H<sub>7</sub>), 7.74–7.63 (m, 8H, A+A', H<sub>2</sub>+H<sub>3</sub>+H<sub>5</sub>+H<sub>6</sub>), 7.60–7.48 (m, 4H, B+B', H<sub>5</sub>+H<sub>6</sub>).  $^{13}\text{C}$  NMR (100 MHz, DMSO- $d_6$ )  $\delta$ : 180.57 (C=Se), 167.23 (C=O), 146.95 (B+B', C<sub>1</sub>), 141.79 (B+B', C<sub>3</sub>), 139.34 (B+B', C<sub>8</sub>), 138.69 (A+A', C<sub>4</sub>), 132.98 (A+A', C<sub>2</sub>+C<sub>6</sub>), 131.32 (A+A', C<sub>1</sub>), 130.64 (B+B', C<sub>6</sub>), 128.86 (B+B', C<sub>5</sub>), 127.36 (B+B', C<sub>7</sub>), 126.44 (B+B', C<sub>6</sub>), 125.95 (A+A', C<sub>3</sub>+C<sub>5</sub>), 124.11 (B+B', C<sub>4</sub>). MS [ $m/z$  (% abundance)]: 161 (100), 211 (80). Elemental analysis calculated (%) for C<sub>32</sub>H<sub>22</sub>N<sub>4</sub>O<sub>2</sub>Se<sub>4</sub> · ½ HCl: C: 43.01, H: 2.52, N: 6.27; found: C: 42.96, H: 2.86, N: 6.07.

1.16. *N,N'*-[(diselanediylbis(benzene-4,1-diyl)selenecarbamoyl)] di-1,3-benzodioxole-5-amide (14)

Chlorination of 1,3-benzodioxole-5-carboxylic acid with thionyl chloride was needed to obtain the corresponding acyl chloride. Conditions: 2 h at room temperature. The product was washed with ethyl ether twice (2 × 25 mL). A yellow powder was obtained. Yield: 80%. Mp: 142–144°C. IR (KBr)  $\text{cm}^{-1}$ : 1662 (C=O), 821 (Se-Se).  $^1\text{H}$  NMR (400 MHz, DMSO- $d_6$ )  $\delta$ : 12.97 (bs, 2H, NH), 11.63 (bs, 2H, NH), 7.72–7.60 (m, 10H, A+A', H<sub>2</sub>+H<sub>3</sub>+H<sub>5</sub>+H<sub>6</sub>, B+B', H<sub>9</sub>), 7.54 (s, 2H, B+B', H<sub>2</sub>), 7.07 (d, 2H, B+B',  $J_{8,7}$  = 8.2 Hz, H<sub>8</sub>), 6.17 (s, 4H, B+B', H<sub>5</sub>).  $^{13}\text{C}$  NMR (100 MHz, DMSO- $d_6$ )  $\delta$ : 180.87 (C=Se), 167.11 (C=O), 152.57 (B+B', C<sub>7</sub>), 152.11 (B+B', C<sub>3</sub>), 147.93 (B+B', C<sub>1</sub>), 139.27 (A+A', C<sub>4</sub>), 133.45 (A+A', C<sub>2</sub>+C<sub>6</sub>), 131.86 (A+A', C<sub>1</sub>), 126.48 (A+A', C<sub>3</sub>+C<sub>5</sub>), 125.52 (B+B', C<sub>9</sub>), 122.95 (B+B', C<sub>8</sub>), 108.96 (B+B', C<sub>2</sub>), 102.71 (B+B', C<sub>5</sub>). MS [ $m/z$  (% abundance)]: 43 (100), 76 (85), 147 (65). Elemental analysis calculated (%) for C<sub>30</sub>H<sub>22</sub>N<sub>4</sub>O<sub>6</sub>Se<sub>4</sub>: C: 42.37, H: 2.61, N: 6.59; found: C: 42.42, H: 2.83, N: 6.48.

1.17. *N,N'*-[(diselanediylbis(benzene-4,1-diyl)selenecarbamoyl)] di-3-quinolineamide (15)

Chlorination of 3-quinolinecarboxylic acid with thionyl chloride was needed to obtain the corresponding acyl chloride. Conditions: 5 h at room temperature. The product was washed with ethyl ether twice (2 × 25 mL). A yellow powder was obtained. Yield: 82%. Mp: 155–156°C. IR (KBr)  $\text{cm}^{-1}$ : 1669 (C=O), 821 (Se-Se).  $^1\text{H}$  NMR (400 MHz, DMSO- $d_6$ )  $\delta$ : 12.92 (bs, 2H, NH), 12.33 (bs, 2H, NH), 9.26 (s, 2H, B+B', H<sub>10</sub>), 9.05 (s, 2H, B+B', H<sub>2</sub>), 8.24–8.05 (m, 4H, B+B', H<sub>5</sub>+H<sub>8</sub>), 7.94 (bs, 2H, B+B', H<sub>7</sub>), 7.70 (bs, 10H, A+A', H<sub>2</sub>+H<sub>3</sub>+H<sub>5</sub>+H<sub>6</sub>, B+B', H<sub>6</sub>).  $^{13}\text{C}$  NMR (100 MHz, DMSO- $d_6$ )  $\delta$ : 181.05 (C=Se), 166.74 (C=O), 150.26 (B+B', C<sub>4</sub>), 149.34 (B+B', C<sub>2</sub>), 139.06 (B+B', C<sub>1</sub>), 138.69 (A+A', C<sub>4</sub>), 132.44 (A+A', C<sub>2</sub>+C<sub>6</sub>), 130.04 (A+A', C<sub>1</sub>), 129.23 (B+B', C<sub>6</sub>), 128.18 (B+B', C<sub>6</sub>), 127.97 (B+B', C<sub>8</sub>), 126.54 (B+B', C<sub>7</sub>), 126.43 (A+A', C<sub>3</sub>+C<sub>5</sub>), 125.84 (B+B', C<sub>10</sub>), 121.23 (B+B', C<sub>5</sub>). MS [ $m/z$  (% abundance)]: 43 (100), 77 (55), 128 (70). Elemental analysis calculated (%) for C<sub>34</sub>H<sub>24</sub>N<sub>6</sub>O<sub>2</sub>Se<sub>4</sub> · HCl: C: 45.33, H: 2.80, N: 9.33; found: C: 45.65, H: 3.13, N: 9.11.

1.18. *N,N'*-[(diselanediylbis(benzene-4,1-diyl)selenecarbamoyl)] di-2-phenyl-4-quinolineamide (16)

Chlorination of 2-phenyl-4-quinolinecarboxylic acid with thionyl chloride was needed to obtain the corresponding acyl chloride. Conditions: 8 h at room temperature. The product was washed with ethyl ether twice (2 × 25 mL). A yellow powder was obtained. Yield: 42%. Mp: 138–139°C. IR (KBr)  $\text{cm}^{-1}$ : 1679 (C=O), 818 (Se-Se).  $^1\text{H}$  NMR (400 MHz, DMSO- $d_6$ )  $\delta$ : 12.87 (bs, 2H, NH), 12.61 (bs, 2H, NH), 8.40 (s, 2H, B+B', H<sub>2</sub>), 8.38–8.29 (bs, 4H, B+B', H<sub>7</sub>+H<sub>8</sub>), 8.29–8.12 (bs, 4H, B+B', H<sub>6</sub>+H<sub>9</sub>), 7.92–7.83 (m, 2H, C+C', H<sub>4</sub>), 7.83–7.67 (m, 8H, A+A', H<sub>2</sub>+H<sub>3</sub>+H<sub>5</sub>+H<sub>6</sub>), 7.67–7.50 (m, 8H, C+C', H<sub>2</sub>+H<sub>3</sub>+H<sub>5</sub>+H<sub>6</sub>).  $^{13}\text{C}$  NMR (100 MHz, DMSO- $d_6$ )  $\delta$ : 180.67 (C=Se), 167.43 (C=O), 155.97 (B+B', C<sub>5</sub>), 148.28 (B+B', C<sub>3</sub>), 138.51 (A+A', C<sub>4</sub>), 135.38 (C+C', C<sub>1</sub>), 134.61 (B+B', C<sub>1</sub>), 133.43 (A+A', C<sub>2</sub>+C<sub>6</sub>), 130.85 (A+A', C<sub>1</sub>), 130.52 (B+B', C<sub>10</sub>), 130.52 (B+B', C<sub>7</sub>), 129.40 (C+C', C<sub>3</sub>+C<sub>5</sub>), 127.81 (C+C', C<sub>2</sub>+C<sub>6</sub>), 127.52 (C+C', C<sub>4</sub>), 125.24 (A+A', C<sub>3</sub>+C<sub>5</sub>), 123.14 (B+B', C<sub>8</sub>), 121.26 (B+B', C<sub>2</sub>), 118.49 (B+B', C<sub>6</sub>), 114.98 (B+B', C<sub>9</sub>). MS [ $m/z$  (% abundance)]: 204 (55), 232 (27),

170 (60) Elemental analysis calculated (%) for  $C_{46}H_{32}N_6O_2Se_4 \cdot HCl$ : C: 52.46, H: 3.16, N: 7.98; found: C: 52.28, H: 3.43, N: 7.62.

## 2. Representative spectra ( $^1H$ and $^{13}C$ ) of final products.

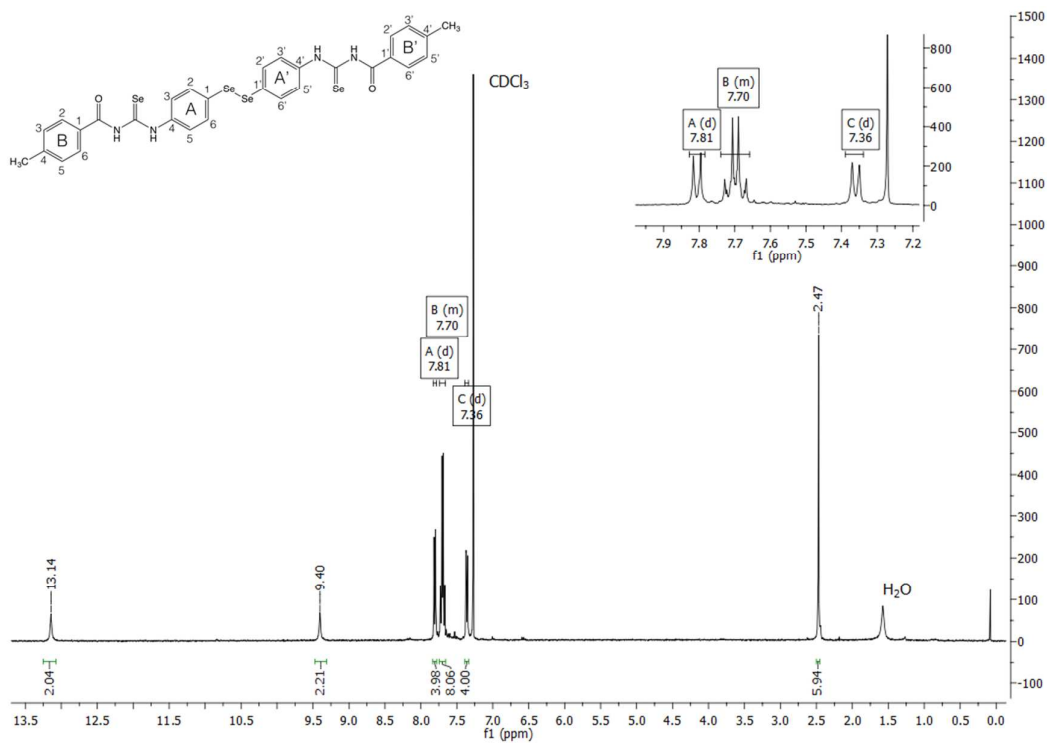

Figure S2.  $^1H$  NMR of compound 2

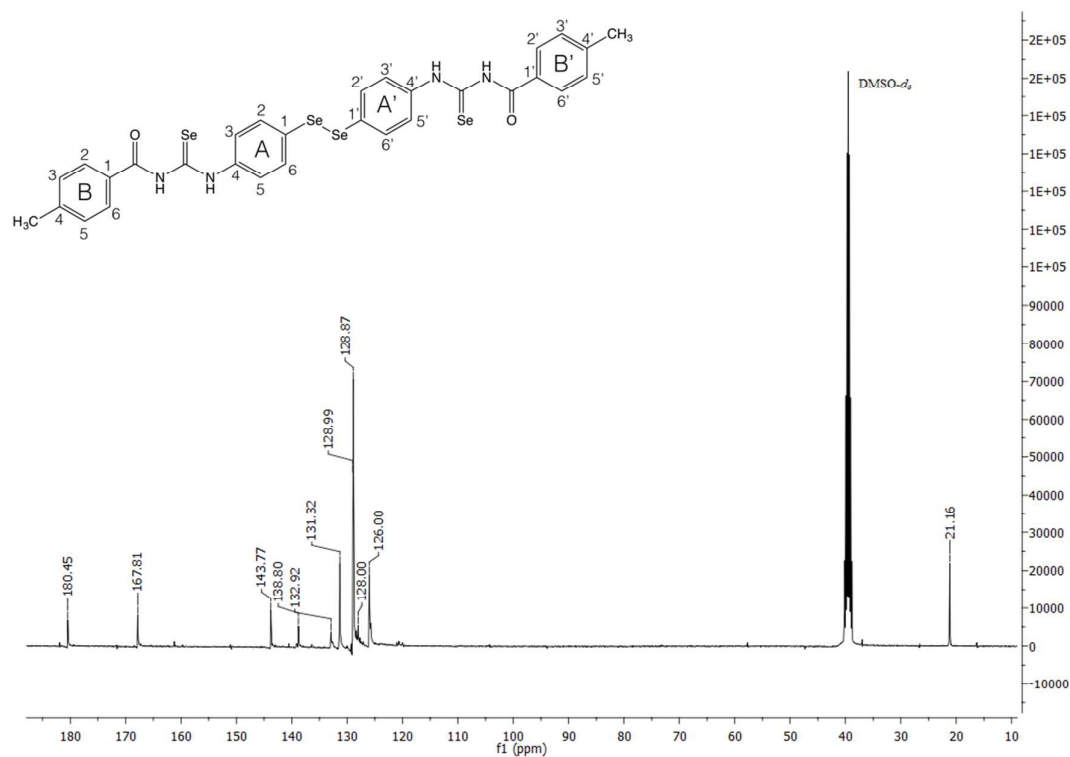

**Figure S3.**  $^{13}\text{C}$  NMR of compound **2**

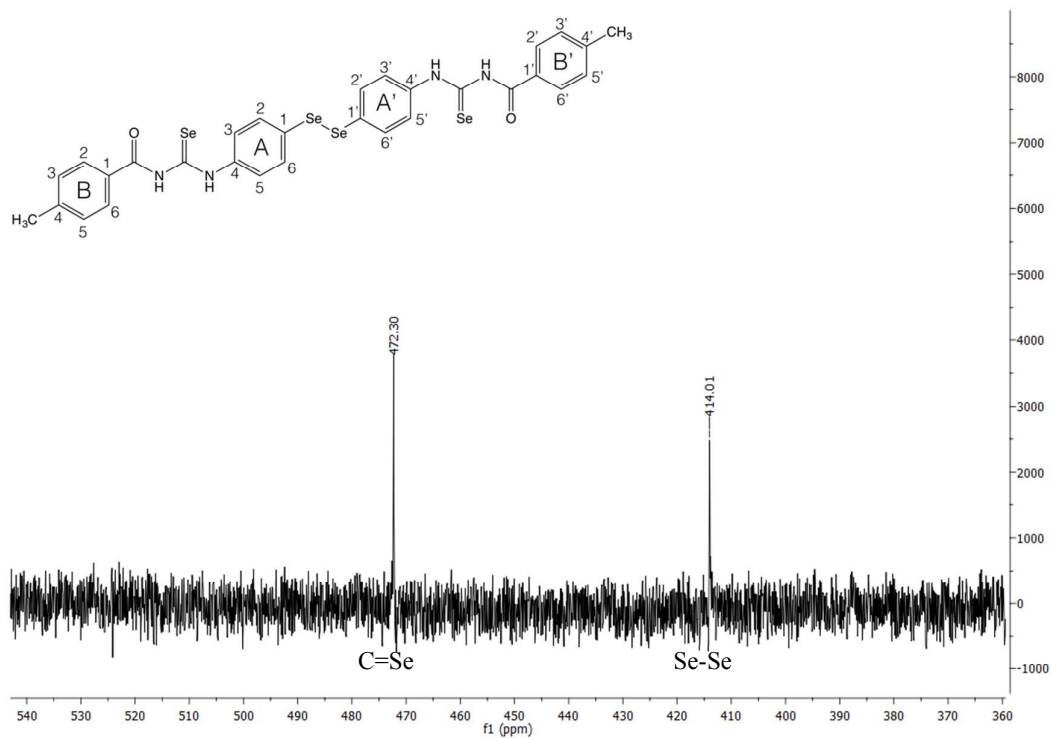

**Figure S4.**  $^{77}\text{Se}$  NMR of compound **2**

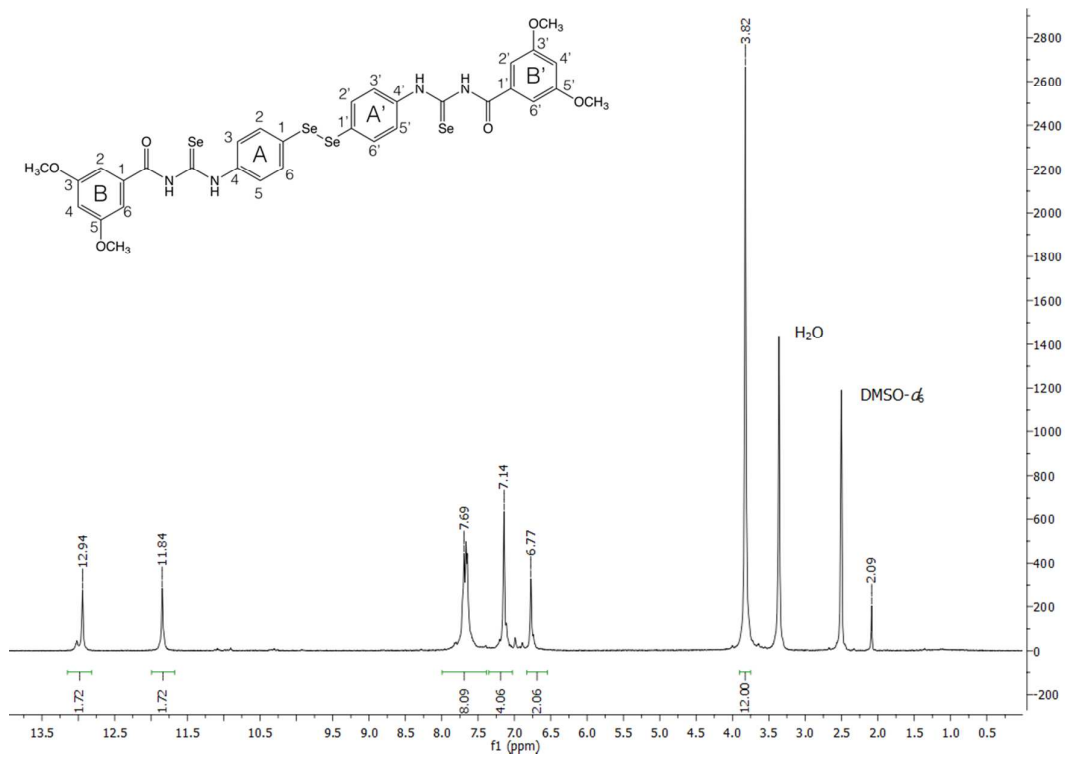

**Figure S5.**  $^1\text{H}$  NMR of compound **7**

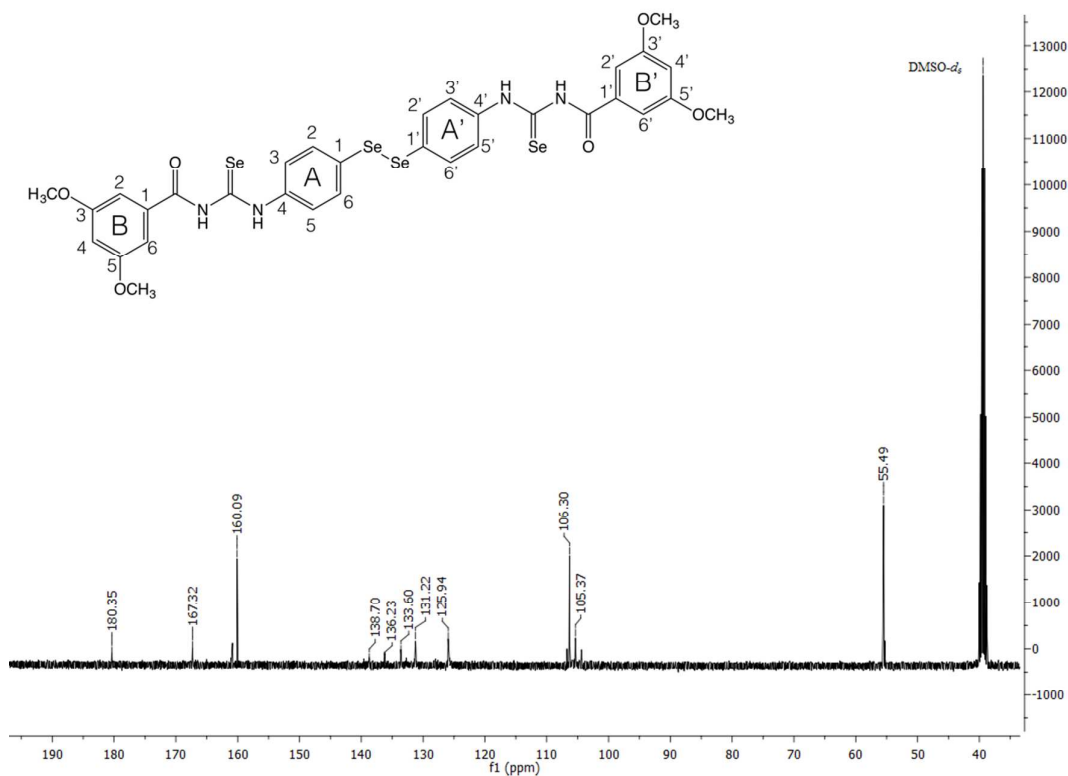

Figure S6. <sup>13</sup>C NMR of compound 7

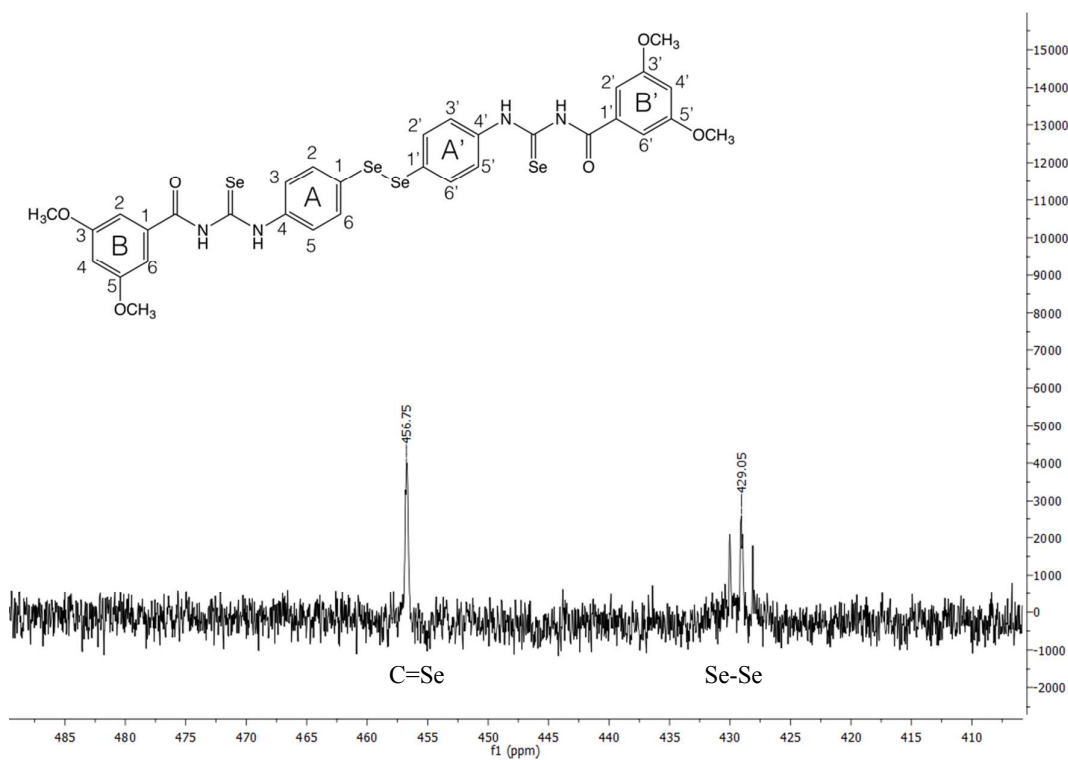

Figure S7. <sup>77</sup>Se NMR of compound 7



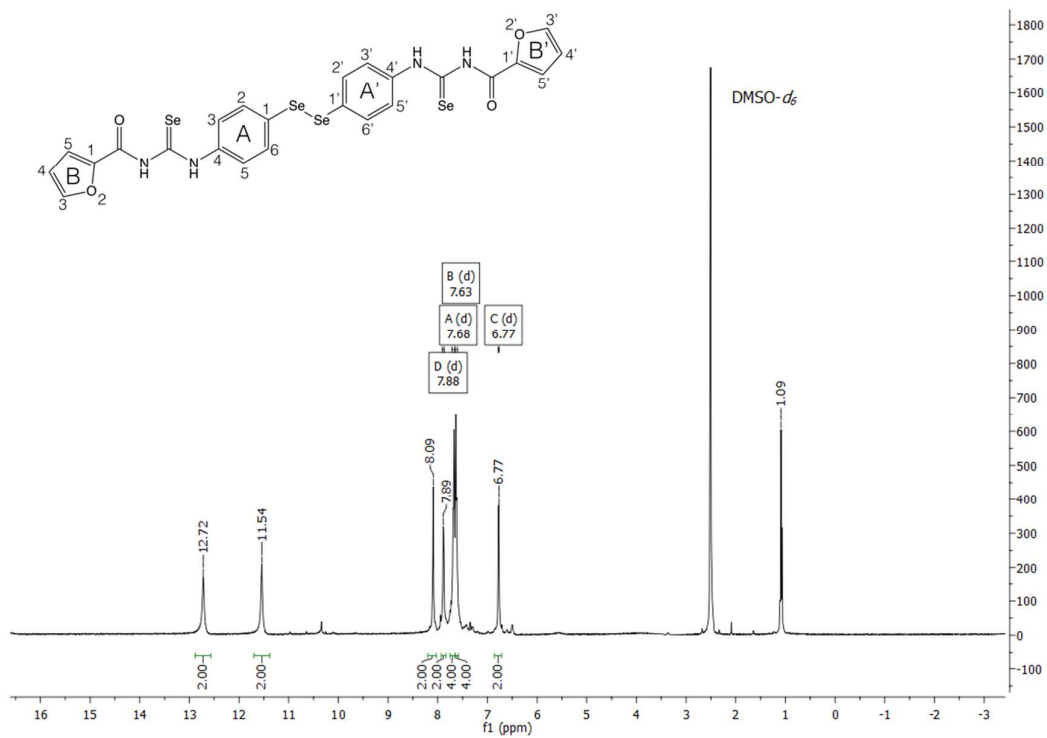

**Figure S8.  $^1\text{H}$  NMR of compound 9**

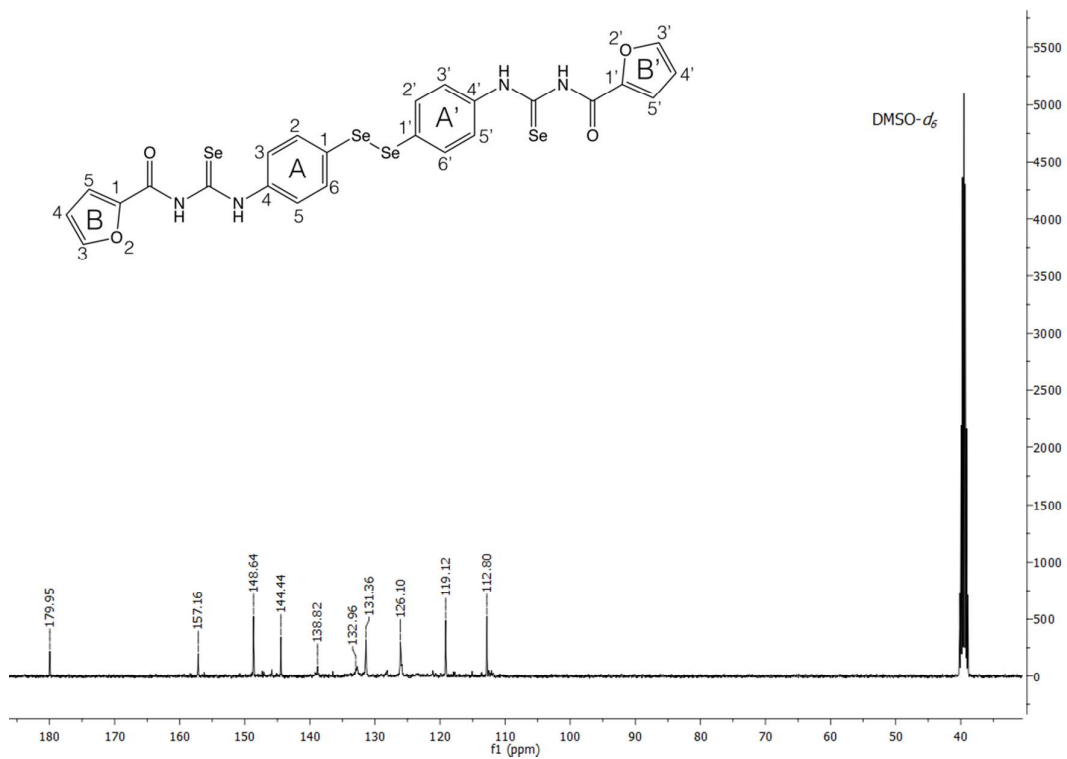

**Figure S9.  $^{13}\text{C}$  NMR of compound 9**

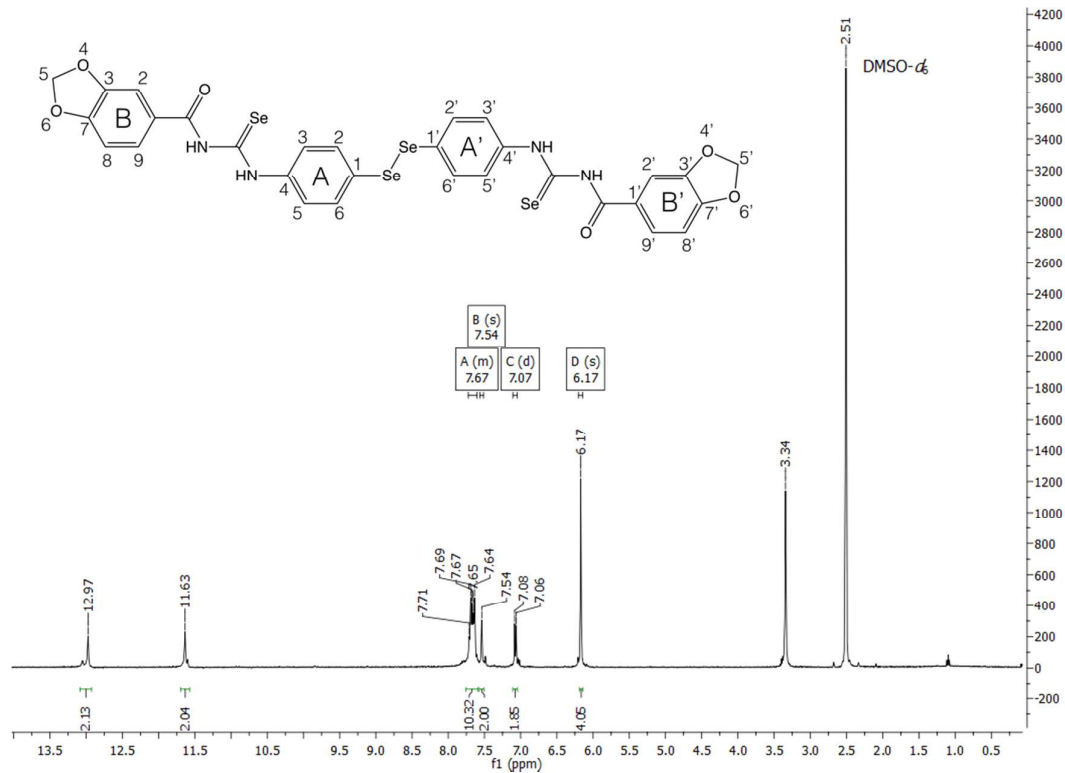

Figure S10. <sup>1</sup>H NMR of compound 14

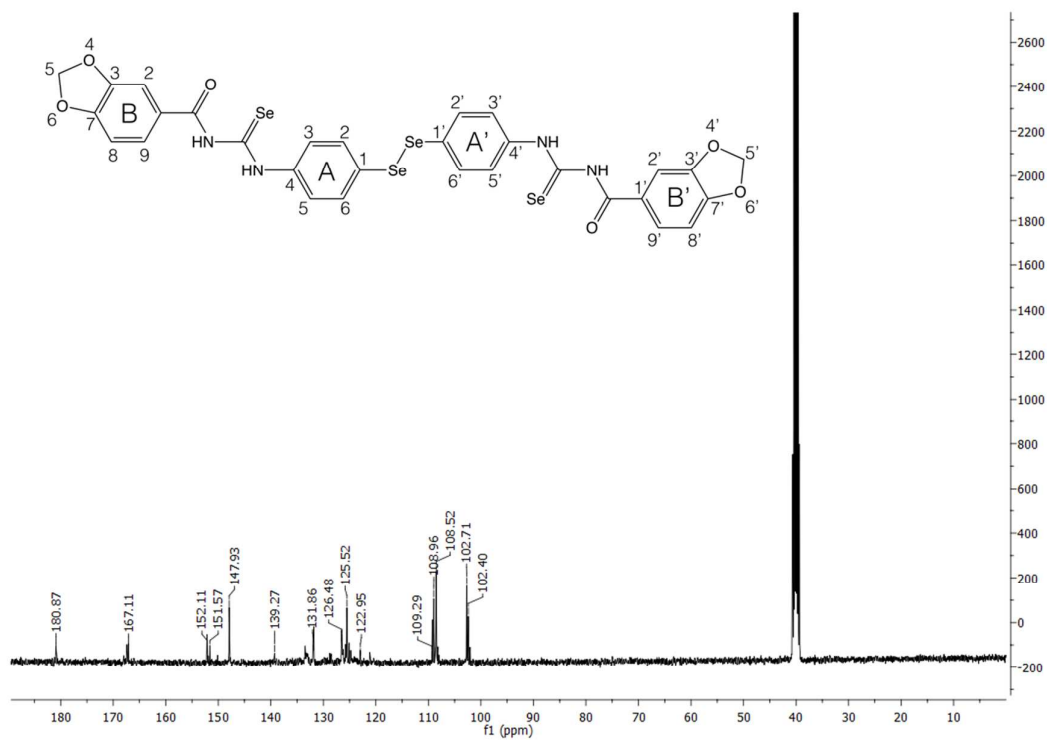

Figure S11. <sup>13</sup>C NMR of compound 14

### 3. Biological evaluation

#### 3.1. Cell cultures

Cell lines were purchased from the American Type Culture Collection (ATCC). MCF-7, CCRF-CEM, HT-29, HTB-54, K-562 and PC-3 cell lines were grown in RPMI 1640 medium (Gibco) supplemented with 10% fetal bovine serum (FBS; Gibco), 100 units/mL penicillin and 100 mg/mL streptomycin (Gibco). BEAS-2B cell line (normal epithelial lung) was cultured in DMEM (Gibco), 10% FBS, 100 units/mL penicillin and 100 µg/mL streptomycin. 184B5 cells were grown in DMEM/F12 medium supplemented with 5% FBS, 1 ITS (Lonza), 100 nM hydrocortisone (Aldrich), 2 mM sodium pyruvate (Lonza), 20 ng/mL EGF (Sigma- Aldrich), 0.3 nM *trans*-retinoic acid (Sigma-Aldrich), 100 units/mL penicillin and 100 mg/mL streptomycin. Cells were maintained at 37°C and 5% CO<sub>2</sub>.

#### 3.2. Cytotoxic and antiproliferative activities

Cell viability was determined using the MTT 3-(4,5-dimethylthiazol-2-yl)-2,5-diphenyl-tetrazolium bromide) method at five different doses ranging from 0.01 to 100 µM, for some compounds lower doses were needed in order to reach 50% cell growth. Depending on cell size, 8,000 to 40,000 cells were seeded per well in 96-well plates, and incubated with the compounds for 72 h. Cells were then incubated with 50 µL of MTT (2 mg/mL stock) for 4 h, medium was removed by aspiration and formazan crystals dissolved in 150 µL of DMSO. The absorbance was measured at 550 nm in a microplate reader (Sunrise reader, Tecan). At least three independent experiments performed in quadruplicate were analysed. Results are summarized in **Table S1** and **S2** expressed as GI<sub>50</sub>, the concentration that reduces by 50% the growth of treated cells with respect to untreated controls, TGI, the concentration that completely inhibits cell growth, and LC<sub>50</sub>, the concentration that kills 50% of the cells.

Table S1. Average values of GI<sub>50</sub>, TGI and LD<sub>50</sub> (μM).

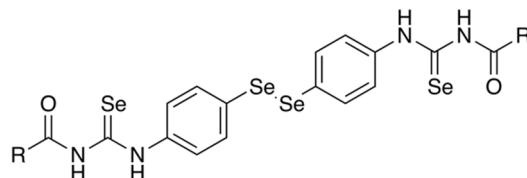

| Code            | R/compound              | MCF-7                         |                  |                               | PC-3                    |       |                  | HTB-54                   |       |                  | HT-29            |       |                  | K-562                   |       |                  | CCRF-CEM                |                        |                  |
|-----------------|-------------------------|-------------------------------|------------------|-------------------------------|-------------------------|-------|------------------|--------------------------|-------|------------------|------------------|-------|------------------|-------------------------|-------|------------------|-------------------------|------------------------|------------------|
|                 |                         | GI <sub>50</sub> <sup>a</sup> | TGI <sup>b</sup> | LC <sub>50</sub> <sup>c</sup> | GI <sub>50</sub>        | TGI   | LC <sub>50</sub> | GI <sub>50</sub>         | TGI   | LC <sub>50</sub> | GI <sub>50</sub> | TGI   | LC <sub>50</sub> | GI <sub>50</sub>        | TGI   | LC <sub>50</sub> | GI <sub>50</sub>        | TGI                    | LC <sub>50</sub> |
| 1               | phenyl                  | 9.76 × 10 <sup>-3</sup>       | 19.29            | 65.23                         | 3.96 × 10 <sup>-2</sup> | 2.78  | 44.43            | 24.78                    | 51.11 | 77.44            | 9.12             | 37.03 | 66.90            | 25.47                   | 58.48 | 91.48            | 0.26                    | 33.71                  | 69.55            |
| 2               | 4-methylphenyl          | 1.30 × 10 <sup>-3</sup>       | 35.01            | >100                          | 5.87 × 10 <sup>-2</sup> | 5.23  | 47.41            | 7.74                     | 30.78 | 73.19            | 6.61             | 31.98 | 66.87            | 25.56                   | 59.86 | 94.16            | 6.79                    | 44.62                  | 83.87            |
| 3               | 4-nitrophenyl           | 3.24 × 10 <sup>-2</sup>       | 28.99            | 72.28                         | 0.27                    | 15.77 | 58.14            | 28.61                    | 55.58 | 82.54            | 9.02             | 37.70 | 68.92            | 32.25                   | >100  | >100             | 0.96                    | 33.34                  | 71.61            |
| 4               | 4-methylthiophenyl      | 5.60 × 10 <sup>-3</sup>       | 15.50            | 56.59                         | 4.46                    | 18.73 | 59.11            | 30.84                    | >100  | >100             | 5.27             | 30.95 | 63.65            | >100                    | >100  | >100             | 6.29 × 10 <sup>-2</sup> | 31.86                  | 72.03            |
| 5               | 4-chlorophenyl          | 4.95 × 10 <sup>-3</sup>       | 8.42             | >100                          | 4.11                    | 32.23 | 72.47            | 13.16                    | 46.98 | 80.80            | 8.95             | 47.15 | 89.38            | 25.38                   | 75.97 | >100             | 2.59 × 10 <sup>-2</sup> | 36.61                  | 82.90            |
| 7               | 3,5-dimethoxyphenyl     | 1.51 × 10 <sup>-4</sup>       | 10.42            | 24.92                         | 7.85 × 10 <sup>-2</sup> | 8.97  | 52.92            | 20.22                    | 45.73 | 71.25            | 17.09            | 73.20 | >100             | >100                    | >100  | >100             | 9.35 × 10 <sup>-2</sup> | 28.46                  | 72.17            |
| 8               | 3,4,5-trimethoxyphenyl  | 9.10                          | 16.22            | 65.23                         | 8.16                    | 55.35 | >100             | 16.03                    | 45.05 | 74.07            | 21.97            | 51.91 | 81.86            | 9.24                    | 61.93 | >100             | 6.64                    | 47.89                  | >100             |
| 9               | furan-2-yl              | 7.93                          | 40.80            | 81.81                         | 5.51                    | 71.22 | >100             | 6.35                     | 20.72 | 60.65            | 3.21             | 9.12  | 56.65            | 84.87                   | >100  | >100             | 0.62                    | 4.18                   | 57.80            |
| 10              | isoxazol-2-yl           | 3.81                          | 6.58             | 9.34                          | 4.33                    | 8.02  | 46.31            | 5.86                     | 25.42 | 62.67            | 6.66             | 34.06 | 66.83            | 9.02                    | 42.93 | 81.10            | 2.33                    | 5.75                   | 9.17             |
| 11              | thiophene-2-yl          | 15.85                         | 30.41            | 75.93                         | 73.92                   | >100  | >100             | 60.75                    | >100  | >100             | 6.58             | 33.63 | 67.48            | 10.20                   | 49.86 | 89.53            | 6.40                    | 33.54                  | 77.32            |
| 12              | 3-chloro-thiophene-2-yl | 13.60                         | 26.93            | 80.03                         | 9.74                    | 37.84 | 66.33            | 48.23                    | >100  | >100             | 5.90             | 33.08 | 63.89            | 15.13                   | 53.92 | 92.71            | 26.71                   | 59.10                  | 91.49            |
| 13              | benzo[b]thiophene-2-yl  | 27.85                         | 59.05            | 90.26                         | 17.64                   | >100  | >100             | 22.58                    | 50.45 | 78.31            | 3.78             | 30.13 | 66.14            | 25.13                   | 68.71 | >100             | 8.71                    | 50.53                  | 98.02            |
| 14              | 1,3-benzodioxole-5-yl   | 25.33                         | 49.16            | 72.99                         | 66.03                   | >100  | >100             | 60.62                    | >100  | >100             | 6.82             | 34.25 | 69.67            | 26.81                   | 81.30 | >100             | 6.39                    | 22.61                  | 96.29            |
| 15              | quinoline-3-yl          | 15.10                         | 45.16            | 75.22                         | 36.42                   | >100  | >100             | 9.11                     | 37.36 | 66.00            | 7.71             | 35.60 | 67.90            | 25.36                   | 58.94 | 92.51            | 4.25                    | 7.16                   | 21.81            |
| 16              | 2-phenylquinoline-4-yl  | 14.72                         | 41.16            | 67.59                         | 10.65                   | 26.50 | 42.34            | >100                     | >100  | >100             | 11.45            | 43.37 | 75.28            | 17.88                   | 51.50 | 85.12            | 12.09                   | 48.14                  | 84.18            |
| Reference drugs |                         |                               |                  |                               |                         |       |                  |                          |       |                  |                  |       |                  |                         |       |                  |                         |                        |                  |
|                 | doxorubicin             | 2.00 × 10 <sup>-3</sup>       | 0.27             | 7.83                          | 1.00 × 10 <sup>-2</sup> | 1.16  | 6.57             | <1.00 × 10 <sup>-2</sup> | 1.25  | 3.45             | 0.10             | 3.98  | 25.12            | 2.00 × 10 <sup>-2</sup> | 0.15  | 0.28             | 3.30 × 10 <sup>-2</sup> | 7.1 × 10 <sup>-2</sup> | 0.29             |
|                 | cisplatin               | 3.16                          | >100             | >100                          | 5.01                    | 50.12 | >100             | 9.64                     | 32.73 | 50               | 7.94             | >100  | >100             | 5.01                    | >100  | >100             | 1                       | 79.63                  | >100             |
|                 | etoposide               | 19.95                         | >100             | >100                          | 0.63                    | 3.98  | 79.43            | n.d. <sup>f</sup>        | n.d.  | n.d.             | 31.62            | >100  | >100             | 12.59                   | >100  | >100             | 1.26                    | 50.12                  | 89.9             |
|                 | MSA                     | 1.28                          | 3.43             | >100                          | 2.45                    | 8.39  | 37.14            | 3.54                     | 6.85  | 19.87            | n.d.             | n.d.  | n.d.             | n.d.                    | n.d.  | n.d.             | 1.08                    | 5.31                   | 9.54             |

<sup>a</sup> GI<sub>50</sub>, concentration that reduces growth by 50% compared to control. <sup>b</sup> TGI, concentration that completely inhibits cell growth. <sup>c</sup> LC<sub>50</sub>, concentration that kills 50% of cells. <sup>d</sup> Not determined.

**Table S2. Average values of GI<sub>50</sub>, TGI and LD<sub>50</sub> (μM) and calculated SI.**

| Code        | R/compound              | 184B5            |       |                  | SI <sup>a</sup> | BEAS-2B          |       |                  | SI <sup>b</sup>   |
|-------------|-------------------------|------------------|-------|------------------|-----------------|------------------|-------|------------------|-------------------|
|             |                         | GI <sub>50</sub> | TGI   | LD <sub>50</sub> |                 | GI <sub>50</sub> | TGI   | LD <sub>50</sub> |                   |
| 1           | phenyl                  | 9.79             | 40.24 | 71.07            | 1,003.20        | 20.01            | 49.73 | 79.45            | 0.81              |
| 2           | 4-methylphenyl          | 9.09             | 73.44 | >100             | 7,005.30        | 4.17             | 46.25 | 95.56            | 0.54              |
| 3           | 4-nitrophenyl           | 8.21             | 40.39 | 76.32            | 253.18          | 4.01             | 33.49 | 70.63            | 0.14              |
| 4           | 4-methylthiophenyl      | 12.68            | 45.87 | 79.07            | 2,264.07        | 7.44             | 37.17 | 77.44            | 0.24              |
| 5           | 4-chlorophenyl          | 8.20             | 84.45 | >100             | 1,660.78        | 2.51             | >100  | >100             | 0.19              |
| 7           | 3,5-dimethoxyphenyl     | 10.49            | 40.48 | 70.47            | 69,673.53       | 9.72             | 43.07 | 76.99            | 0.48              |
| 8           | 3,4,5-trimethoxyphenyl  | 6.41             | 27.05 | 62.86            | 0.70            | 9.49             | 40.54 | 73.02            | 0.59              |
| 9           | furan-2-yl              | 4.58             | 12.50 | 70.61            | 0.58            | 5.45             | 19.50 | 63.02            | 0.86              |
| 10          | isoxazol-2-yl           | 2.80             | 5.04  | 7.28             | 0.73            | 0.80             | 8.31  | 51.26            | 0.14              |
| 11          | thiophene-2-yl          | 6.96             | 33.06 | 66.45            | 0.44            | 7.64             | 34.66 | 68.97            | 0.13              |
| 12          | 3-chloro-thiophene-2-yl | 8.05             | 33.41 | 62.58            | 0.59            | 7.13             | 35.11 | 69.89            | 0.15              |
| 13          | benzo[b]thiophene-2-yl  | 70.83            | >100  | >100             | 2.54            | 13.59            | >100  | >100             | 0.60              |
| 14          | 1,3-benzodioxole-5-yl   | 20.44            | 75.75 | >100             | 0.81            | >100             | >100  | >100             | n.d. <sup>c</sup> |
| 15          | quinoline-3-yl          | 9.66             | 75.42 | >100             | 0.64            | 3.48             | 21.94 | 65.14            | 0.38              |
| 16          | 2-phenylquinoline-4-yl  | 8.64             | 34.63 | 63.78            | 0.59            | >100             | >100  | >100             | n.d. <sup>c</sup> |
| doxorubicin |                         | 1.15             | 4.60  | 8.06             | 574             | 0.13             | 0.45  | 0.78             | >13               |
| MSA         |                         | 1.79             | 3.84  | >100             | 1.40            | 3.66             | 6.18  | 8.69             | 1.03              |

<sup>a</sup> Selectivity index (SI) calculated as GI<sub>50</sub> (184B5)/GI<sub>50</sub> (MCF-7). <sup>b</sup> SI calculated as GI<sub>50</sub> (BEAS-2B)/GI<sub>50</sub>(HTB-54). <sup>c</sup> Not determined.

### 3.3. Evaluation of cell cycle progression and cell death

A fixed population of MCF-7 cells were seeded in 25 cm<sup>2</sup> flasks and incubated overnight. Cultures were treated with the corresponding concentration of compounds **2**, **7**, DMSO (control) or 6 μM camptothecin (positive control). Seeded population was dependent on studied time point: 3 × 10<sup>6</sup> cells/flask for 24 h or shorter treatment, 2 × 10<sup>6</sup> cells/flasks for 48 h treatment and finally 1 × 10<sup>6</sup> cells/flask for 72 h experiments. Apo-Direct kit (BD Pharmingen) was used to determine cell cycle distribution and cell death percentage. Cells were fixed in a 1% paraformaldehyde solution in PBS for 30–40 min at 0°C, washed with PBS twice and incubated for 30 min with 70% ethanol on ice. Staining was performed following manufacturer's protocol and samples were analysed by flow cytometry using a Counter Epics XL cytometer (Beckman Counter). **Figure S12** shows a stacked cell cycle histogram corresponding to compound **7** effects at different time-course experiments.

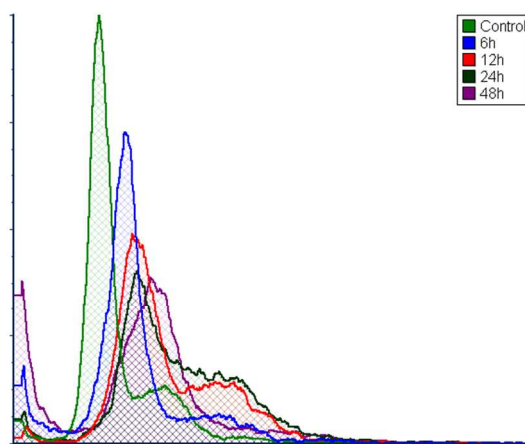

**Figure S12.** Cell cycle analysis after treatment with compound **7** for different periods of time.

In order to perform the inhibition assays, cells were pre-treated with 50  $\mu\text{M}$  of the pan-caspase inhibitor Z-VAD-FMK (BD Pharmigen) or 100 nM of the autophagy inhibitor wortmannin (Santa Cruz) for 1 h. The cells were treated with 10  $\mu\text{M}$  of **2** or **7**, DMSO was added to the control cells. Samples were processed following the same methodology stated above. **Figure S13** corresponds to representative cell death analysis for the inhibitor assays.

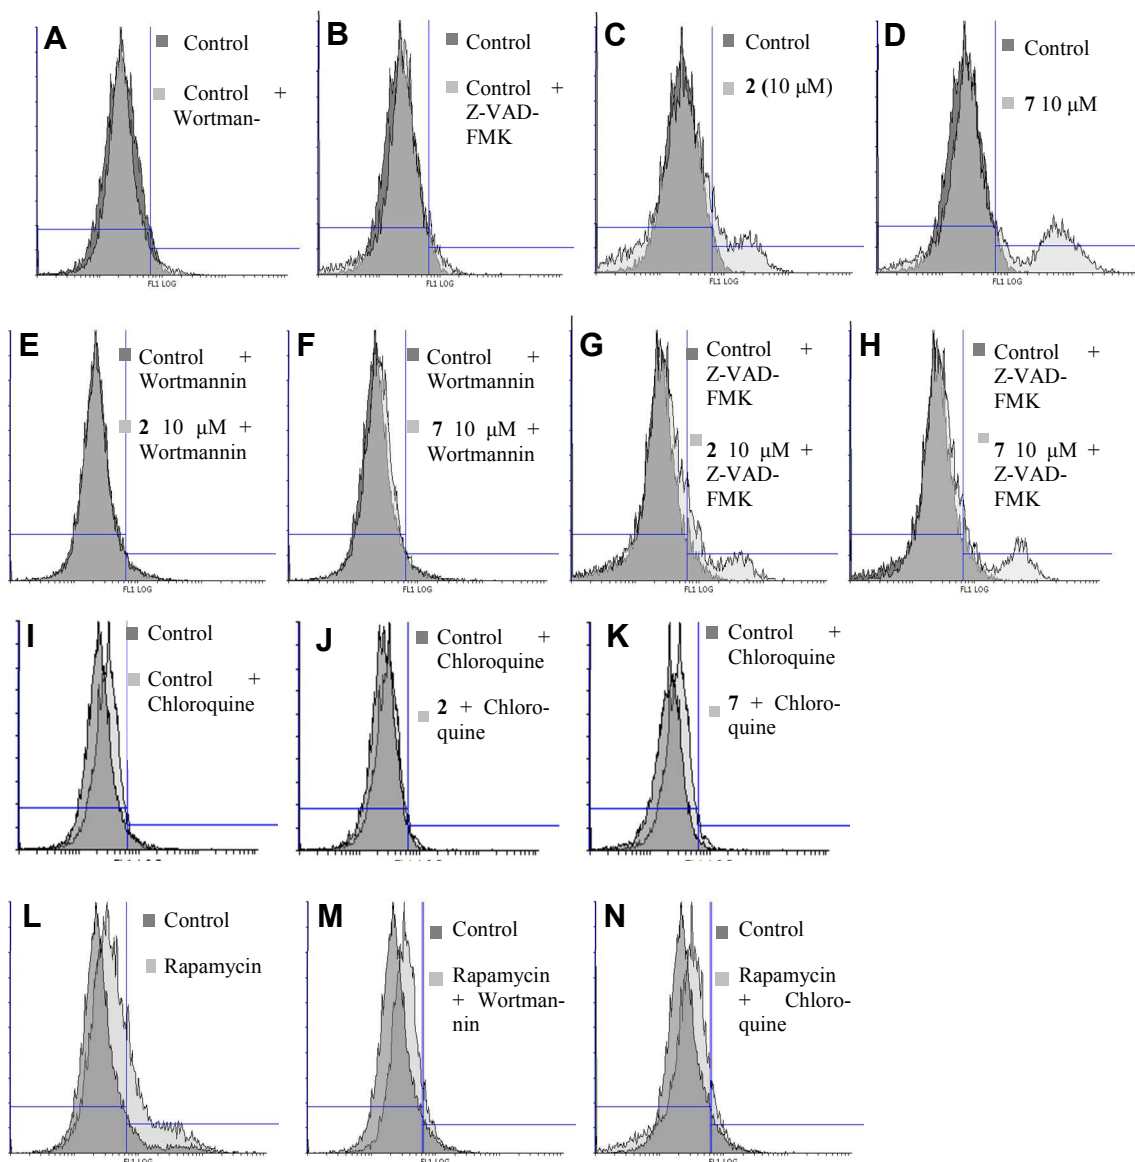

**Figure S13.** Cell death induced by compounds **2** and **7** is blocked by wortmannin but not by caspase inhibitor Z-VAD-FMK. Figures A-H show representative experiments stacked with the control graphs for each experiment.

### 3.4. Statistical analysis

Statistical data represent the mean  $\pm$  SEM of at least three independent experiments performed in duplicate. Mann-Whitney U-test was used to establish statistical significance of differences between control and treatment groups. GraphPad Prism version 7 was used, significant differences were considered at \* $p < 0.05$ , \*\* $p < 0.01$  and \*\*\* $p < 0.001$

### 3.5. Protein analysis

Proteins were detected by Western blot. Specific antibodies LC3B (Cell Signaling), Beclin-1 (D40C5, Cell Signaling) and Actin (H-300) (Santa Cruz Biotechnology). Anti-rabbit IgG, conjugated with peroxidase was used as secondary anti-body from Cell Signaling.
